# Supplementary material for: Novel high-resolution targeted sequencing of the cervicovaginal microbiome
Source: PubMed Central journal article supplement (PMC8680041; doi:10.1186/s12915-021-01204-z), 2021-12-16
Supplement: 12915_2021_1204_MOESM2_ESM.pdf [file 12915_2021_1204_MOESM2_ESM.pdf]

**List of smMIPs and sequences used for CiRNAseq profiling of the cervicovaginal microbiome**

| <b>ID</b> | <b>Working ID</b>                                                                     | <b>Extension probe</b>    | <b>Ligation probe</b>         |
|-----------|---------------------------------------------------------------------------------------|---------------------------|-------------------------------|
| smMIP1    | Anaerococcus_obesiensis+Anaerococcus_obesiensis_product_23S_0022                      | CAGATGGAAAAGATGGTCT       | AGTCACTATCCAGACCAAAGCGCCC     |
| smMIP2    | Aspergillus_tubingensis+KT326815_1_product_18S_0002                                   | AGAAATTGACGGAAGGGCA       | GGATGGTGGTGCATGGCCGTTCTTAG    |
| smMIP3    | Bacteroides_dorei_DSM_17855+product_23S_0009                                          | TTCTGCGTGAATCTGCCGGG      | TGCGCCTACAAGCGGTCCGAGCT       |
| smMIP4    | Bacteroides_sp_3_1_23_NZ_GG774959_1_rna10_0006                                        | AATGCGTTCCCCGGGCCTTGTA    | CGTAACAAGGTAGCCGTACCGGAA      |
| smMIP5    | Bifidobacterium_angulatum_JCM_7096_GCF_0010251551_ASM102515v1_NZ_AP012322_1_rna0_0019 | TGGCTAGTTGTAGAGAGTAGTAAAA | GTAGTCATATGCTTGTCTC           |
| smMIP6    | Candida_orthopsilosis_Candida_orthopsilosis_product_18S_0028                          | CTGGGGGATAACAGTTAG        | ACGGCCCAACAAAGCGACGATCAGTAG   |
| smMIP7    | Clostridium_bolteae_ATCC_BAA_613_GCF_0001543651_ASM15436v1_NZ_DS480694_1_rna30_0007   | ACCGCCCCGTCGCTACTACCG     | CAAGGTTTCCGTAGGTGAACC         |
| smMIP8    | Coprinus_comatus_Coprinus_comatus_product_18S_0002                                    | AATTGACGGGGCCCCGCACAAGC   | GGTGGTGCATGGCTGTCGTC          |
| smMIP9    | Cutibacterium_acnes_J139_NZ_ADFS01000001_1_rna32_0028                                 | CCCAGGCAACTGTTTATCAAAA    | CGGCGGCCGTAACATAACGGT         |
| smMIP10   | Eubacterium_siraeum_DSM_15702_GCF_0003820851_ASM38208v1+NZ_KB907544_1_0016            | TGTACAGGATAGGTGGGAGA      | GTGGGCAGTTTGACTGGGGCGGT       |
| smMIP11   | Eubacterium_siraeum_DSM_15702_GCF_0003820851_ASM38208v1+NZ_KB907544_1_0020            | TAGCAAACAGGATTAGA         | GCAAGGTTGAAACTCAAAGGAATTGACG  |
| smMIP12   | Faecalibacterium_prausnitzii_NZ_DS483500_1_rna34_0106                                 | GTTGTCACGCCAGTGG          | GATAGGTTGGGGGTGTACGCGCAGTAAT  |
| smMIP13   | Fusobacterium_equinum+product_23S_0034                                                | TTACGCGTACTCACCCGTC       | CACTGTTTTGATTTTTTACACCTTG     |
| smMIP14   | Fusobacterium_gonidiaformans+NZ_GG657972_1_rna44_0002                                 | ATGGGGCAAAGACGT           | GGTTTTCTGCGTTCAGCCTGAGAAGGGGG |
| smMIP15   | Hepacivirus_C_NC_004102_1_id2_0121                                                    | CCACAAGAACACATCATACAA     | GTGGTTATCCTGCGTTGATGCCT       |
| smMIP16   | Hepatitis_B_virus_NC_003977_2_cds6_0017                                               | CTCTGTGTTAGTTTAAAGTGCA    | GTAAGGTGCAGAAAGAATATGCA       |
| smMIP17   | Human_immunodeficiency_virus_NC_001802_1_id7_0072                                     | GCGAAAGCGTGGGTAG          | GGGGAGTACGGCCGAAGGTTGAAACT    |
| smMIP18   | Mageeibacillus_indolicus_NC_013895_2_rna7_0011                                        | TGATTTCTCGTAAGGTGCCG      | AATGAAAACGTCCTTGGCAAATGC      |
| smMIP19   | Nakaseomyces_delphensis+Nakaseomyces_delphensis_product_18S_0023                      | TGCTGATTTGACGTCATCCCCACCT | GCACGAGCTGACGACAACCA          |
| smMIP20   | Prevotella_copri_NZ_GG703855_1_rna43_0029                                             | GGAAGGTGCGGCTGGA          | GGGGGATTAGCTCAGTTGGCTAGA      |
| smMIP21   | Prevotellamassilia_timonensis_NZ_LT629844_1_rna35_0020                                | TCCAAAGGAACTCCTACCTTACGCC | CCCTGTCACAGAACTGCCGC          |
| smMIP22   | Primate_T_lymphotropic_virus_1_NC_001436_1_id2_0064                                   | CCTTCAACAGGACATCA         | GACTCTAAATATTTAATCAAATACCT    |
| smMIP23   | Primate_T_lymphotropic_virus_2_NC_001488_1_id8_0071                                   | AAACCAACCGGGATTGCCTT      | TGGAACAGGACGTCATAGAG          |
| smMIP24   | Saccharomyces_pastorianus_Saccharomyces_pastorianus_product_26S_0001                  | CTTCATGTAGTCGAGTTGCAGA    | GCATGATGATTTGACGTCATCCC       |
| smMIP25   | Shuttleworthia_satelles_DSM_14600_NZ_GG665866_1_rna19_0005                            | AAGTCGTAACAAGGTAGCC       | GGAGAGCGCCTGCTTTGCACGCAGGA    |
| smMIP26   | Streptococcus_gordonii_str_Challis_substr_CH1+NC_009785_1_rna27_0043                  | TCCAATAGTTATCCCC          | CAGCGTTCGTCTGAGCCAGGATCAAACCT |
| smMIP27   | Streptococcus_macedonicus_NC_016749_1_rna66_0143                                      | AGCTAATACCGCATAA          | GATACATAGCCGACCTGAGAGGGTGATCG |
| smMIP28   | Streptococcus_macedonicus+NC_016749_1_rna0_0019                                       | TTGAAAACCTGAACAAGAC       | TTTGATCCTGGCTCAGGACGAACGC     |
| smMIP29   | Streptococcus_oralis_subsp_dentisani+NZ_CAUI01000005_1_rna23_0027                     | GGACGAAAGTCTGACGGAG       | GCCACGGCTAACTACGTGCCAGCAG     |
| smMIP30   | Veillonella_seminalis_NZ_JH992937_1_rna41_0017                                        | TCGACTTGCATGTGTTAAGC      | TGACCTTATCAAATACCTA           |
