# Supplementary material for: Novel high-resolution targeted sequencing of the cervicovaginal microbiome
Source: PubMed Central journal article supplement (PMC8680041; doi:10.1186/s12915-021-01204-z), 2021-12-16
Supplement: 12915_2021_1204_MOESM4_ESM.pdf [file 12915_2021_1204_MOESM4_ESM.pdf]

| <b>Bacterial species</b>             | <b>Source</b> | <b>Authentication reference</b> |
|--------------------------------------|---------------|---------------------------------|
| <i>Anaerococcus tetradius</i>        | MMB           | Sanger sequencing               |
| <i>Anaerococcus vaginalis</i>        | MMB           | Sanger sequencing               |
| <i>Escherichia coli</i>              | Commercial    | ATCC 25922                      |
| <i>Gardnerella vaginalis</i>         | MMB           | Sanger sequencing               |
| <i>Peptostreptococcus anaerobius</i> | MMB           | Sanger sequencing               |
| <i>Prevotella buccalis</i>           | MMB           | Sanger sequencing               |
| <i>Prevotella copri</i>              | MMB           | Sanger sequencing               |
| <i>Prevotella denticola</i>          | MMB           | Sanger sequencing               |
| <i>Prevotella disiens</i>            | MMB           | Sanger sequencing               |
| <i>Lactobacillus delbruecki</i>      | MMB           | Sanger sequencing               |
| <i>Lactobacillus fermentum</i>       | MMB           | Sanger sequencing               |
| <i>Lactobacillus jensenii</i>        | MMB           | Sanger sequencing               |
