# Supplementary material for: Novel high-resolution targeted sequencing of the cervicovaginal microbiome
Source: PubMed Central journal article supplement (PMC8680041; doi:10.1186/s12915-021-01204-z), 2021-12-16
Supplement: 12915_2021_1204_MOESM5_ESM.pdf [file 12915_2021_1204_MOESM5_ESM.pdf]

| <b>T</b> | <b>TP</b> | <b>OD</b> | <b>RNAc</b> | <b>URC R1</b> | <b>URC R2</b> | <b>URCm</b> | <b>Comment</b>              |
|----------|-----------|-----------|-------------|---------------|---------------|-------------|-----------------------------|
| 0        | 1         | 0.057     | 3.26        | 345           | 594           | 469.5       | Lag phase                   |
| 1        | -         | 0.057     | -           | -             | -             | -           | -                           |
| 2        | 2         | 0.061     | 2.82        | 600           | 488           | 544         | Start growth phase          |
| 3        | -         | 0.062     | -           | -             | -             | -           | -                           |
| 4        | 3         | 0.078     | 6.12        | 1257          | 1303          | 1280        | Growing phase               |
| 5        | 4         | 0.145     | 11.45       | 1713          | 1369          | 1541        | Begin of exponential phase  |
| 6        | 5         | 0.206     | 15.7        | 1959          | 1895          | 1927        | Exponential + growing phase |
| 7        | -         | 0.280     | -           | -             | -             | -           | -                           |
| 22.5     | 6         | 0.349     | 18.15       | 1213          | 943           | 1078        | Stationary phase            |
| 23.5     | 7         | 0.315     | 15.95       | 1160          | 1268          | 1214        | Stationary phase            |
| 24.5     | -         | 0.292     | -           | -             | -             | -           | -                           |
| 25.5     | -         | 0.345     | -           | -             | -             | -           | -                           |
| 26.5     | 8         | 0.317     | 8.86        | 0             | 0             | 0           | Autoclaved                  |
| 27.5     | -         | 0.290     | -           | -             | -             | -           | -                           |
| 28.5     | -         | 0.308     | -           | -             | -             | -           | -                           |
| 29.5     | -         | 0.335     | -           | -             | -             | -           | -                           |
| 46.5     | -         | 0.305     | -           | -             | -             | -           | -                           |
| 47.5     | -         | 0.296     | -           | -             | -             | -           | -                           |
| 48.5     | 9         | 0.301     | 11.65       | 723           | 1648          | 1185.5      | Antibiotic                  |
