# Supplementary material for: Novel high-resolution targeted sequencing of the cervicovaginal microbiome
Source: PubMed Central journal article supplement (PMC8680041; doi:10.1186/s12915-021-01204-z), 2021-12-16
Supplement: 12915_2021_1204_MOESM9_ESM.pdf [file 12915_2021_1204_MOESM9_ESM.pdf]

In silico analyses I

1. Anaerococcus vaginalis vs. Anaerococcus tetradius

ROI 1

CLUSTAL O(1.2.4) multiple sequence alignment

```
Anaerococcus_tetradius_smMIPCopri      TGATGATTTGACGTCATCCCCACCTTCCTCCGGTTTATCACCGGCAGTATATCTAGAGTC      60
Anaerococcus_vaginalis_smMIPCopri      TGATGATTTGACGTCGTCGCCACCTTCCTCCGGTTTATCACCGGCAGTATCGTAGAGTC      60
*****

Anaerococcus_tetradius_smMIPCopri      CCCAACTTAATGATGGTAACTAAATATAGGGGTTGCGCTCGTTATGGGACTTAACCCAAC      120
Anaerococcus_vaginalis_smMIPCopri      CCCAACTTAATGATGGTAACTAAAGATAGGGGTTGCGCTCGTTATGGGACTTAACCCAAC      120
*****

Anaerococcus_tetradius_smMIPCopri      ATCTCACGACACGAGCTGACGACAACCA      148
Anaerococcus_vaginalis_smMIPCopri      ATCTCACGACACGAGCTGACGACAACCA      148
*****
```

5 SNPs on 148 nt = (148-5: 143)/148 \* 100 = **96.62% similarity**

ROI 2

CLUSTAL O(1.2.4) multiple sequence alignment

```
Anaerococcus_tetradius_smMIPsSattelless  CTTCATGCACTCGAGTTGCAGAGTCAATCCGAAGTGGGACAGGCTTTTGTAGTTTGTCT 60
Anaerococcus_vaginalis_smMIPsSattelless  CTTCATGTACTCGAGTTGCAGAGTACAATCCGAAGTGGGACAGACTTTGTAGTTTGTCT 60
*****

Anaerococcus_tetradius_smMIPsSattelless  TAACTTCGCAGTCTCGCTTCCCTGTGTACCTGCCATTGTAGCACGTGTGTAGCCCAAGTC 120
Anaerococcus_vaginalis_smMIPsSattelless  TCAGATCGCTCTTTCGCTGCCCTCTGTATCTGCCATTGTAGCACGTGTGTAGCCCAAGTC 120
* * * * *

Anaerococcus_tetradius_smMIPsSattelless  ATAAAGGGCATGATGATTTGACGTCATCCC      150
Anaerococcus_vaginalis_smMIPsSattelless  ATAAAGGGCATGATGATTTGACGTCGTC      150
*****
```

15 SNPs on 150 nt = (150-15: 135)/150 \* 100 = **90.00% similarity**

ROI 3

CLUSTAL O(1.2.4) multiple sequence alignment

```
Anaerococcus_tetradius_smMIPCacnes      GACGACAACCATGCACCACCTGTATTACAGTCTCCGAAGAAGTAAGGAACTATCTCTAA 60
Anaerococcus_vaginalis_smMIPCacnes      GACGACAACCATGCACCACCTGTAATACAGTAGACCGAAGTCATAGAAAATTATCTCTAA 60
*****

Anaerococcus_tetradius_smMIPCacnes      TTCCTCCGTAATATGTCAAGACTTGGTAAGGTTCTTCGCGTTGCGTCGAATTAACCAC 120
Anaerococcus_vaginalis_smMIPCacnes      TTCCTCCGTAATATGTCAAGACTTGGTAAGGTTCTTCGCGTTGCGTCGAATTAACCAC 120
*****

Anaerococcus_tetradius_smMIPCacnes      ATGCTCCGCTGCTTGTGCGGGTCCCGTCAATT      153
Anaerococcus_vaginalis_smMIPCacnes      ATGCTCCGCTGCTTGTGCGGGTCCCGTCAATT      153
*****
```

12 SNPs on 153 nt = (153-12: 141)/153 \* 100 = **92.16% similarity**

ROI 4

CLUSTAL O(1.2.4) multiple sequence alignment

```
Anaerococcus_tetradium_smMIPBangulatum      TTCCGATACGGCTACCTTGTACGACTTCACCCAGTTACTGACCTACCTTCGACTGCT      60
Anaerococcus_vaginalis_smMIPBangulatum      TTCCGATACGGCTACCTTGTACGACTTCACCCAGTTACTGACCTACCTTCGACTGCT      60
*****

Anaerococcus_tetradium_smMIPBangulatum      GCTTCCTAA-TGGTTAGCTCACAGGCTTCGGGTATTGCCAACTCCATGGTGTGACGGGC      119
Anaerococcus_vaginalis_smMIPBangulatum      GCGTCCTAAAAGGTTTCGCTCACAGGCTTCGGGTATTGCCAACTCCATGGTGTGACGGGC      120
** ***** **

Anaerococcus_tetradium_smMIPBangulatum      GGTGTGTACAAGACCCGGGAACGCATT 146
Anaerococcus_vaginalis_smMIPBangulatum      GGTGTGTACAAGACCCGGGAACGCATT 147
*****
```

5 SNPs on 146 nt = (146-5: 141)/146 \* 100 = **96.58% similarity**

ROI 5

CLUSTAL O(1.2.4) multiple sequence alignment

```
Anaerococcus_tetradium_smMIPFpraustnizii    CGTCAATTCCTTTGAGTTTCACACTTGCCTGCGTACTCCAGGGGAGTGTTTATTGCG      60
Anaerococcus_vaginalis_smMIPFpraustnizii    CGTCAATTCCTTTGAGTTTCACACTTGCCTGCGTACTCCAGGGGAGTGTTTATTGCG      60
*****

Anaerococcus_tetradium_smMIPFpraustnizii    TTAGCTGCGGCACCCAGATTATTCCAGACACCTAACACTCATCGTTTACGGCGTGGACTA      120
Anaerococcus_vaginalis_smMIPFpraustnizii    TTAGCTGCGGCTCCAGATTATTCCAAGAACCTAACACTCATCGTTTACAGCGTGGACTA      120
*****

Anaerococcus_tetradium_smMIPFpraustnizii    CCAGGGTATCTAATCCTGTTTGCTA 145
Anaerococcus_vaginalis_smMIPFpraustnizii    CCAGGGTATCTAATCCTGTTTGCTA 145
*****
```

6 SNPs on 145 nt = (145-6: 139)/145 \* 100 = **95.86% similarity**

2. Anaerococcus tetradium vs. Peptostreptococcus anaerobius

ROI 1

CLUSTAL O(1.2.4) multiple sequence alignment

```
Anaerococcus_tetradium_smMIPCopri           TGATGATTTGACGTCATCCCCACCTTCCTCCGGTTTATCACCGGCAGTATATCTAGAGTC      60
Peptostreptococcus_anaerobius_smMIPCopri    TGATGATTTGACGTCATCCCCACCTTCCTCCAGGTTATCCCTGGCAGTCTCTAGAGTG      60
*****

Anaerococcus_tetradium_smMIPCopri           CCCAACTTAATGATGGTAACTAAATATAGGGGTTGCGCTCGTTATGGGACTTAACCCAAC      120
Peptostreptococcus_anaerobius_smMIPCopri    CCCAACTGAATGCTGGCAACTAAAGACAAGGTTGCGCTCGTTGCGGGACTTAACCCAAC      120
*****

Anaerococcus_tetradium_smMIPCopri           ATCTCACGACACGAGCTGACGACAACCA 148
Peptostreptococcus_anaerobius_smMIPCopri    ATCTCACGACACGAGCTGACGACAACCA 148
*****
```

14 SNPs on 148 nt = (148-14: 134)/148 \* 100 = **90.54% similarity**

ROI 2

CLUSTAL O(1.2.4) multiple sequence alignment

```
Anaerococcus_tetradium_smMIPcacnes      GACGACAACCATGCACCACCTGTATTACAGTCTCCGAAGAAGTAAGGAATATCTCTAA      60
Peptostreptococcus_anaerobius_smMIPcacnes GACGACAACCATGCACCACCTGTACCTCAGC----CCGGAAGGGAAGGTGTGATTAAC      56
***** * * * * *
Anaerococcus_tetradium_smMIPcacnes      TTCCCTCCGTAATATGTCAAGACTTGGTAAGGTTCTTCGCGTTGCGTCGAATTAACCAC      120
Peptostreptococcus_anaerobius_smMIPcacnes ACCGGTCTAAGGGATGTCAAGCTTAGGTAAGGTTCTTCGCGTTGCTTCAATTAACCAC      116
* ** * * * * * * * * * * * * * * * * * * * * * * * * * * * * * * * *
Anaerococcus_tetradium_smMIPcacnes      ATGCTCCGCTGCTTGTGCGGGTCCCGTCAATT      153
Peptostreptococcus_anaerobius_smMIPcacnes ATGCTCCGCTACTTGTGCGGGTCCCGTCAATT      149
***** * * * * * * * * * * * * * * * * * * * * * * * * * * * * * * * *
```

42 SNPs on 149 nt = (149-42: 107)/149 \* 100 = **71.81% similarity**

ROI 3

CLUSTAL O(1.2.4) multiple sequence alignment

```
Anaerococcus_tetradium_smMIPpraustinizii CGTCAATTCCTTTGAGTTTCACACTTGCCTGCGTACTCCCGAGGCGGAGTGTATTATGCG      60
Peptostreptococcus_anaerobius_smMIPpraustinizii CGTCAATTCCTTTGAGTTTCACACTTGCCTGCGTACTCCCGAGGCGGAGTACTTAATGCG      60
***** * * * * * * * * * * * * * * * * * * * * * * * * * * * * * * * *
Anaerococcus_tetradium_smMIPpraustinizii      TTAGCTGCGGCACCCAGAT---TATTCCAGACACCTAACACTCATCGTTTACGGCGTGG      116
Peptostreptococcus_anaerobius_smMIPpraustinizii TTAGCTGCGGCACCCAGGGGGTAACCCCGACACTAGTACTCATCGTTTACAGCGTGG      120
***** * * * * * * * * * * * * * * * * * * * * * * * * * * * * * * * *
Anaerococcus_tetradium_smMIPpraustinizii      ACTACCAGGGTATCTAATCCTGTTTGCTA      145
Peptostreptococcus_anaerobius_smMIPpraustinizii ACTACCAGGGTATCTAATCCTGTTTGCTA      149
***** * * * * * * * * * * * * * * * * * * * * * * * * * * * * * * * *
```

17 SNPs on 145 nt = (145-17: 128)/145 \* 100 = **88.28% similarity**

ROI 4

CLUSTAL O(1.2.4) multiple sequence alignment

```
Anaerococcus_tetradium_smMIPBangulatum      TTCCGATACGGCTACCTTGTACGACTTCACCCAGTTACTGACCTACCTTCGACTGCT      60
Peptostreptococcus_anaerobius_smMIPBangulatum TTCCGATACGGCTACCTTGTACGACTTCACCCAGTTATCGACGCCACCTTCGACGACT      60
***** * * * * * * * * * * * * * * * * * * * * * * * * * * * * * * * *
Anaerococcus_tetradium_smMIPBangulatum      GCTTCCTAATGGTTAGCTCACAGGCTTCGGGTATTGCCAACTTCCATGGTGTGACGGGCG      120
Peptostreptococcus_anaerobius_smMIPBangulatum TCCTCCTTGCGGTTGGATAATCGGCTTCGGGTGTTCCGACTCCCATGGTGTGACGGGCG      120
* **** * * * * * * * * * * * * * * * * * * * * * * * * * * * * * * * *
Anaerococcus_tetradium_smMIPBangulatum      GTGTGTACAAGACCCGGGAACGCATT      146
Peptostreptococcus_anaerobius_smMIPBangulatum GTGTGTACAAGACCCGGGAACGCATT      146
***** * * * * * * * * * * * * * * * * * * * * * * * * * * * * * * * *
```

20 SNPs on 146 nt = (146-20: 126)/146 \* 100 = **86.30% similarity**

### 3. Peptostreptococcus anaerobius vs Gardnerella vaginalis

#### ROI 1

CLUSTAL O(1.2.4) multiple sequence alignment

```

Gardnerella_vaginalis_smMIPPcopri      TGATGATCTGACGTCATCCCCACCTTCTCCGAGTTAACCCGCGGTCCCCGTGAGTT      60
Peptostreptococcus_anaerobius_smMIPPcopri  TGATGATTTGACGTCATCCCCACCTTCTCCAGGTTATCCCTGGCAGTCTCTAGAGTG      60
*****
Gardnerella_vaginalis_smMIPPcopri      CCCGGCATAACCCGCTGGCAACACAGGGCGAGGGTTGCGCTCGTTGCGGGACTTAACCCA      120
Peptostreptococcus_anaerobius_smMIPPcopri  CCCAAC--TGAATGCTGGCAACTAAAGACAAGGGTTGCGCTCGTTGCGGGACTTAACCCA      118
*** *
Gardnerella_vaginalis_smMIPPcopri      ACATCTCACGACACGAGCTGACGACGACCA      150
Peptostreptococcus_anaerobius_smMIPPcopri  ACATCTCACGACACGAGCTGACGACAACCA      148
*****

```

25 SNPs on 148 nt = (148-25: 123)/148 \* 100 = **83.10% similarity**

#### ROI 2

CLUSTAL O(1.2.4) multiple sequence alignment

```

Gardnerella_vaginalis_smMIPCacnes      -----AATTGACGGGGGCCCGCACAAGCGGCGGAG----CATGCGGATTAATTCGA      47
Peptostreptococcus_anaerobius_smMIPCacnes  GACGACAACCATGCACCACCTGTCACTCAGCCCCGAAGGGAAGGTGTGATTAACACCG      60
** ** * * * * *
Gardnerella_vaginalis_smMIPCacnes      TGC--AACGCGAAGAACCTTACCTGGGCTTGACATGTGCCTGTCGACTGCAGAGATGTGG      105
Peptostreptococcus_anaerobius_smMIPCacnes  GTCTAAGGGATGTCAAGCTTAGGTAAGTTCTTCGCGTTGCTTCAATTAACACCATGC      120
* * * * * * * * *
Gardnerella_vaginalis_smMIPCacnes      TTTCCCTTCGGGGCAGGTTACAGGTGGTGCATGGTCGTCGTC      148
Peptostreptococcus_anaerobius_smMIPCacnes  TCCGCTACTTGTGCGGGTCCCCGTC AATT-----      149
* * * * * * *

```

95 SNPs on 148 nt = (148-95: 53)/148 \* 100 = **35.81% similarity**

### 4. Gardnerella vaginalis vs Prevotella buccalis

#### ROI 1

CLUSTAL O(1.2.4) multiple sequence alignment

```

Gardnerella_vaginalis_smMIPPcopri      -TGATGATCTGACGTCATCCCCACCTTCTCCGAGTTA-----ACCCCGCGGTCCC--      51
Prevotella_buccalis_smMIPPcopri      TGTTTGTGTCGTCAGCTCGTGGCGTGAGGTGTCGGCTTAAGTGCATAACGAGCGCAACCCC      60
* * * * * * * * *
Gardnerella_vaginalis_smMIPPcopri      --CCGTGAGTTCCCGGCATAACCCGCTGGCAACACAGGGCGAGGGTTGCGCTCGTTGCGG      109
Prevotella_buccalis_smMIPPcopri      TTTTTTCAGTTGCCATCAGGTAATGCTGGGCACTCTGGA-----GA      101
* * * * * * * * *
Gardnerella_vaginalis_smMIPPcopri      GACTTAACC--CAACATCTCACGACACGAGCTGACGACGACCA-----      150
Prevotella_buccalis_smMIPPcopri      TACTGCCACCGCAAGGTGTGA-GGAAGGTGGGGATGACGTCAAATCAGCA      150
*** * * * * * * * *

```

87 SNPs on 150 nt = (150-87: 63)/150 \* 100 = **42.00% similarity**

ROI 2

CLUSTAL O(1.2.4) multiple sequence alignment

```
Gardnerella_vaginalis_smMIPBangulatum    AATGCGTTCCCGGGCCTTGTACACACCGCCCGTCAAGTCATGAAAGTGGGCAGCACCCGA 60
Prevotella_buccalis_smMIPBangulatum      AATACGTTCCCGGGCCTTGTACACACCGCCCGTCAAGCCATGAAAGCCGGGGTGCCTGA 60
*** **

Gardnerella_vaginalis_smMIPBangulatum    AGCCGGTGGCCTAACCTTTTGGGATGGAGCCGTCTAAGGTGAGGCTCGTGATTGGGACT 120
Prevotella_buccalis_smMIPBangulatum      AGTCCGTAACC-----GTCAAGGAGCGGCCTAGGGCAAAGTGGTGATTGGGGCT 110
** * ** * * * * * * * * * * * * * * * * * * * * * * * * * * * * * * * * * * * * * * *

Gardnerella_vaginalis_smMIPBangulatum    AAGTCGTAACAAGGTAGCCGTACCGGAA 148
Prevotella_buccalis_smMIPBangulatum      AAGTCGTAACAAGGTAGCCGTACCGGAA 138
*****
```

35 SNPs on 138 nt = (138-35: 103)/138 \* 100 = **74.63% similarity**

In silico analyses II

1. Comparison of V3-V4 variable regions

CLUSTAL O(1.2.4) multiple sequence alignment

|                        |                                                                                                                                    |     |
|------------------------|------------------------------------------------------------------------------------------------------------------------------------|-----|
| Bifidobacterium_longum | TGGGAATATTGCACAATGGGCGCAAGCCTGATGCAGCGACGCCGCGTGAGGGATGGAGG                                                                        | 60  |
| Gardnerella_vaginalis  | TGGGAATATTGCACAATGGGGGAAACCTGACGACGCGACGNCGCGTGCGGGATGAAGG<br>***** * * * * * * * * * * * * * * * * * * * * * * * * * * * * * *    | 60  |
| Bifidobacterium_longum | CCTTCGGGTTGTAACCTCTTTTATCGGGGAGCAAGC--GTGAGTGAGTTTACCCGTTG                                                                         | 117 |
| Gardnerella_vaginalis  | CCTTCGGGTTGTAACCGCTTTTGATTGGGAGCAAGCCTTTGGGTGAGTGACCTTTCG<br>***** * * * * * * * * * * * * * * * * * * * * * * * * * * * * * *     | 120 |
| Bifidobacterium_longum | AATAAGCACC GGCTAACTACGTGCCAGCAGCCGCGGTAATACGTAGGGTGCAAGCGTTAT                                                                      | 177 |
| Gardnerella_vaginalis  | AATAAGCACC GGCTAACTACGTGCCAGCAGCCGCGGTAATACGTAGGGTGCAAGCGTTAT<br>***** * * * * * * * * * * * * * * * * * * * * * * * * * * * * * * | 180 |
| Bifidobacterium_longum | CCGGAATTATTGGGCGTAAAGGGCTCGTAGGCGGTTTCGTCGCGTCCGGTGTGAAAGTCCA                                                                      | 237 |
| Gardnerella_vaginalis  | CCGGAATTATTGGGCGTAAAGAGCTTAGGCGGTTTCGTCGCGTCCGGTGTGAAAGCCCA<br>***** * * * * * * * * * * * * * * * * * * * * * * * * * * * * * *   | 240 |
| Bifidobacterium_longum | TCGCTTAACGGTGGATCCGCGCCGGTACGGGCGGGCTTGAGTGCAGTAGGGGAGACTGG                                                                        | 297 |
| Gardnerella_vaginalis  | TCGCTTAACGGTGGNTTGCGCCGGTACGGGCGGGCTAGAGTGCAGTAGGGGAGACTGG<br>***** * * * * * * * * * * * * * * * * * * * * * * * * * * * * * *    | 300 |
| Bifidobacterium_longum | AATCCCGGTGTAACGGTGGAAATGTGTAGATATCGGGAAGAACACCAATGGCGAAGGCAG                                                                       | 357 |
| Gardnerella_vaginalis  | AATTCGCGTGAACGGTGGAAATGTGTAGATATCGGGAAGAACACCAATGGCGAAGGCAG<br>**** * * * * * * * * * * * * * * * * * * * * * * * * * * * * * *    | 360 |
| Bifidobacterium_longum | GTCTCTGGGCCGTTACTGACGCTGAGGAGCGAAAGCGTGGGGAGCGAACA                                                                                 | 407 |
| Gardnerella_vaginalis  | GTCTCTGGCGTGTACTGACGCTGAGAAGCGAAAGCGTGGGGAGCGAACA                                                                                  | 410 |
|                        | ***** * * * * * * * * * * * * * * * * * * * * * * * * * * * * * *                                                                  |     |

37 SNPs on 410 nt =  $(410-37: 373)/410 * 100 = 90.97\%$  similarity

2. Comparison of the five ROIs from V5 - V9 variable regions

ROI from VR V7

CLUSTAL O(1.2.4) multiple sequence alignment

|                                                                          |                                                                                                                                  |     |
|--------------------------------------------------------------------------|----------------------------------------------------------------------------------------------------------------------------------|-----|
| Bifidobacterium_longum_ROI_VR7_Prevotella_copri_NZ_GG703855_1_rna43_0029 | TGATGATCTGACGTCATCCCACCTTCTCCGAGTTAACCCGCGGTTCCCGTGAGTT                                                                          | 60  |
| Gardnerella_vaginalis_ROI_VR7_Prevotella_copri_NZ_GG703855_1_rna43_0029  | TGATGATCTGACGTCATCCCACCTTCTCCGAGTTAACCCGCGGTTCCCGTGAGTT<br>***** * * * * * * * * * * * * * * * * * * * * * * * * * * * * * *     | 60  |
| Bifidobacterium_longum_ROI_VR7_Prevotella_copri_NZ_GG703855_1_rna43_0029 | CCCGGCATAATCCGCTGGCAACACGGGCGAGGGTTGCGCTGTTGCGGGACTTAACCCA                                                                       | 120 |
| Gardnerella_vaginalis_ROI_VR7_Prevotella_copri_NZ_GG703855_1_rna43_0029  | CCCGGCATAACCCGCTGGCAACACAGGGCGAGGGTTGCGCTGTTGCGGGACTTAACCCA<br>***** * * * * * * * * * * * * * * * * * * * * * * * * * * * * * * | 120 |
| Bifidobacterium_longum_ROI_VR7_Prevotella_copri_NZ_GG703855_1_rna43_0029 | ACATCTCACGACACGAGCTGACGACACCA                                                                                                    | 150 |
| Gardnerella_vaginalis_ROI_VR7_Prevotella_copri_NZ_GG703855_1_rna43_0029  | ACATCTCACGACACGAGCTGACGACACCA<br>***** * * * * * * * * * * * * * * * * * * * * * * * * * * * * * *                               | 150 |

2 SNPs on 150 nt =  $(150-2: 148)/150 * 100 = 98.66\%$  similarity

ROI from VR V8

CLUSTAL O(1.2.4) multiple sequence alignment

```

Bifidobacterium_longum_ROI_VR8_Shuttleworthia_satelles_DSM_14600_NZ_G6665866_1_rna19_0005      CTTCACGCAGTCGAGTTGCAGACTGCGATCCGAAGTGAAGCCGGTTTTCAGGGATCCGCT      60
Gardnerella_vaginalis_ROI_VR8_Shuttleworthia_satelles_DSM_14600_NZ_G6665866_1_rna19_0005      CTTCACGTAGTCGAGTTGCAGACTACGATCCGAAGTGAAGCCAGTTTAAAGGGATTAGCA      60
*****

Bifidobacterium_longum_ROI_VR8_Shuttleworthia_satelles_DSM_14600_NZ_G6665866_1_rna19_0005      CCGCGTCGCCCGTCGCATCCCGTTGTACCGCCATTTAGTAGCATGCGTGAAGCCCTGGAC      120
Gardnerella_vaginalis_ROI_VR8_Shuttleworthia_satelles_DSM_14600_NZ_G6665866_1_rna19_0005      CCATGTCACCATGAAGCAACCGTTGTACTGGCCATTTAGTAGCATGCGTGAAGCCCTGGAC      120
*****

Bifidobacterium_longum_ROI_VR8_Shuttleworthia_satelles_DSM_14600_NZ_G6665866_1_rna19_0005      GTAAGGGGCATGATGATCTGACGTCATCCC      150
Gardnerella_vaginalis_ROI_VR8_Shuttleworthia_satelles_DSM_14600_NZ_G6665866_1_rna19_0005      GTAAGGGGCATGATGATCTGACGTCATCCC      150
*****

```

15 SNPs on 150 nt = (150-15: 135)/150 \* 100 = **90.0% similarity**

ROI from VR V5

CLUSTAL O(1.2.4) multiple sequence alignment

```

Bifidobacterium_longum_ROI_VR5_Mageeibacillus_indolicus_NC_013895_2_rna7_0011      AGTTTTAGCCTTGCGCCGCTACTCCCAGGCGGGATGCTTAACGCGTTAGCTCCGACACG      60
Gardnerella_vaginalis_ROI_VR5_Mageeibacillus_indolicus_NC_013895_2_rna7_0011      -GCGAAAGCGTGG-----GGAGCGAACAGGATTAGATACCTCGGTAGTCCACGCCG      60
*   *   *   *   *   *   *   *   *   *   *   *   *   *   *   *   *   *   *   *   *   *

Bifidobacterium_longum_ROI_VR5_Mageeibacillus_indolicus_NC_013895_2_rna7_0011      GAACCCGTGGAAAGCGGCCACATCCAGCATCCACCGTTTACGGCGTGGACTACCAAGGGT      120
Gardnerella_vaginalis_ROI_VR5_Mageeibacillus_indolicus_NC_013895_2_rna7_0011      TAAACGGTGGACGCTGGATGTGGGGCCATTCCACGGGTTCTGTGTGCGAGCTAACCGCT      110
* * * * * * * * * * * * * * * * * * * * * * * * * * * * * * * * * * * * * * * *

Bifidobacterium_longum_ROI_VR5_Mageeibacillus_indolicus_NC_013895_2_rna7_0011      ATCTAATCCT-----GTTGCTCCCCACGCTTTCGC-      151
Gardnerella_vaginalis_ROI_VR5_Mageeibacillus_indolicus_NC_013895_2_rna7_0011      TAAGCGTCCCGCTGGGGAGTACGGCCGAAGGCTAAAAC      151
* * * * * * * * * * * * * * * * * * * * * * * * * * * * * * * * * * * * * * * *

```

91 SNPs on 151 nt = (151-91: 59)/151 \* 100 = **39.0% similarity**

ROI from VR V6

CLUSTAL O(1.2.4) multiple sequence alignment

```

Bifidobacterium_longum_ROI_VR6_Cutibacterium_acnes_J139_NZ_ADFS01000001_1_rna32_0028      ----GACGACGACCATGCACCAC-----TGTGAACCCGCCCGAAGGGGAAG      43
Gardnerella_vaginalis_ROI_VR6_Cutibacterium_acnes_J139_NZ_ADFS01000001_1_rna32_0028      AATTGACGGGGG-CGCAACAAGCGCGGAGCATGCGGATTAATTCGATGCAACGCGAAG      59
*****

Bifidobacterium_longum_ROI_VR6_Cutibacterium_acnes_J139_NZ_ADFS01000001_1_rna32_0028      CCGTATCTCTACGACCTCGGGAACATGTCAAGCGCCAGGTAAGTTCTTCGCGTTCATC      103
Gardnerella_vaginalis_ROI_VR6_Cutibacterium_acnes_J139_NZ_ADFS01000001_1_rna32_0028      AACCTTACCTGGGCTTGACATGTGCTGACGACTGCAGAGATGTGTTTCCTTTCGGGGC      119
* * * * * * * * * * * * * * * * * * * * * * * * * * * * * * * * * * * * * * * *

Bifidobacterium_longum_ROI_VR6_Cutibacterium_acnes_J139_NZ_ADFS01000001_1_rna32_0028      GAATTAATCCGATGCTCCGCCGCTTGTGCG-GGCCCCCGTCAATT      148
Gardnerella_vaginalis_ROI_VR6_Cutibacterium_acnes_J139_NZ_ADFS01000001_1_rna32_0028      AGGTT-----CACAGGTGTGATGGTGTGCTGTC----      148
**   *   *   *   *   *   *   *   *   *   *   *   *   *   *   *   *   *   *   *

```

84 SNPs on 148 nt = (148-84: 64)/148 \* 100 = **43.2% similarity**

ROI from VR V9

CLUSTAL O(1.2.4) multiple sequence alignment

```

Bifidobacterium_longum_ROI_VR9_Bifidobacterium_angulatum_JCM_7096_GCF_0010251551_ASM102515v1_NZ_AP012322_1_rna0_0019      TTCCGGTACGGTACCTTGTACGACTAGTCCCAATCAGGACCTCACCTTAGACGGCT      60
Gardnerella_vaginalis_ROI_VR9_Bifidobacterium_angulatum_JCM_7096_GCF_0010251551_ASM102515v1_NZ_AP012322_1_rna0_0019      -----AATGCGTCCCGGCTGTACACCCCGCTCAAGTCATGAAGGTGGG      50
* * * * * * * * * * * * * * * * * * * * * * * * * * * * * * * * * * * * * * * *

Bifidobacterium_longum_ROI_VR9_Bifidobacterium_angulatum_JCM_7096_GCF_0010251551_ASM102515v1_NZ_AP012322_1_rna0_0019      CCATCCCAAGGGGTTAGGC-CACCGGCTCGGGTCTGCCCATTTTCATGACTT----      115
Gardnerella_vaginalis_ROI_VR9_Bifidobacterium_angulatum_JCM_7096_GCF_0010251551_ASM102515v1_NZ_AP012322_1_rna0_0019      CAGCACCCGAAGCCGGTGGCTAACCTTTTGGGATGGAGCCGCTTAAGGTGAGGCTCGT      110
*   *   *   *   *   *   *   *   *   *   *   *   *   *   *   *   *   *   *   *   *   *

Bifidobacterium_longum_ROI_VR9_Bifidobacterium_angulatum_JCM_7096_GCF_0010251551_ASM102515v1_NZ_AP012322_1_rna0_0019      GACGGGCGGT----GTGTACAAGGCCGGGAACGCATT      149
Gardnerella_vaginalis_ROI_VR9_Bifidobacterium_angulatum_JCM_7096_GCF_0010251551_ASM102515v1_NZ_AP012322_1_rna0_0019      GATTGGGACTAAGTCTAACAAGGTAGCGCTACCGGAA-      148
** * * * * * * * * * * * * * * * * * * * * * * * * * * * * * * * * * * * * * * * *

```

88 SNPs on 148 nt = (148-88: 60)/148 \* 100 = **40.5% similarity**
