# Supplementary material for: Novel high-resolution targeted sequencing of the cervicovaginal microbiome
Source: PubMed Central journal article supplement (PMC8680041; doi:10.1186/s12915-021-01204-z), 2021-12-16

16S rRNA  
gene sequencing

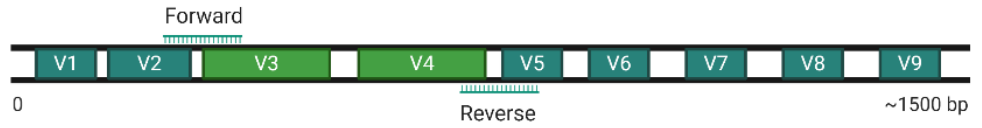

CiRNAseq

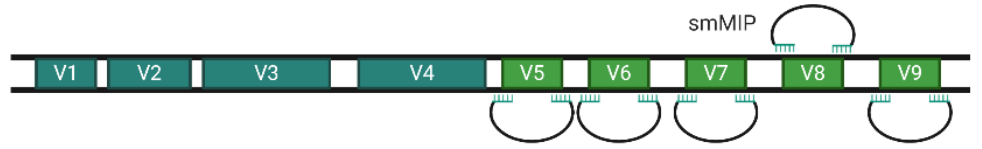

16S *B. longum*  
16S *G. vaginalis*

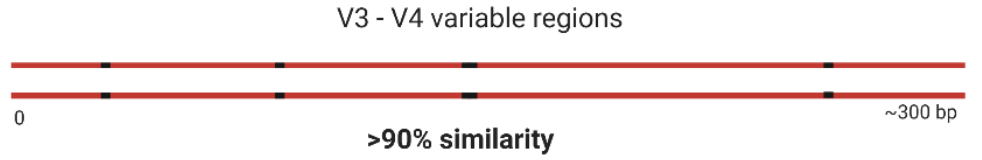

ROIs for *B. longum*  
ROIs for *G. vaginalis*

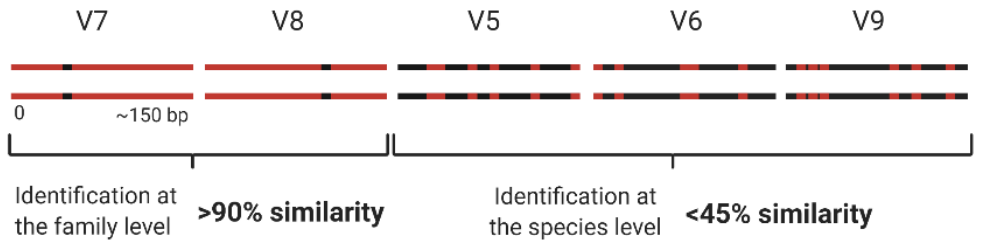

Supplement: 12915_2021_1204_MOESM12_ESM.pdf [file 12915_2021_1204_MOESM12_ESM.pdf]
