# Supplementary material for: Novel high-resolution targeted sequencing of the cervicovaginal microbiome
Source: PubMed Central journal article supplement (PMC8680041; doi:10.1186/s12915-021-01204-z), 2021-12-16
Supplement: 12915_2021_1204_MOESM21_ESM.pdf [file 12915_2021_1204_MOESM21_ESM.pdf]

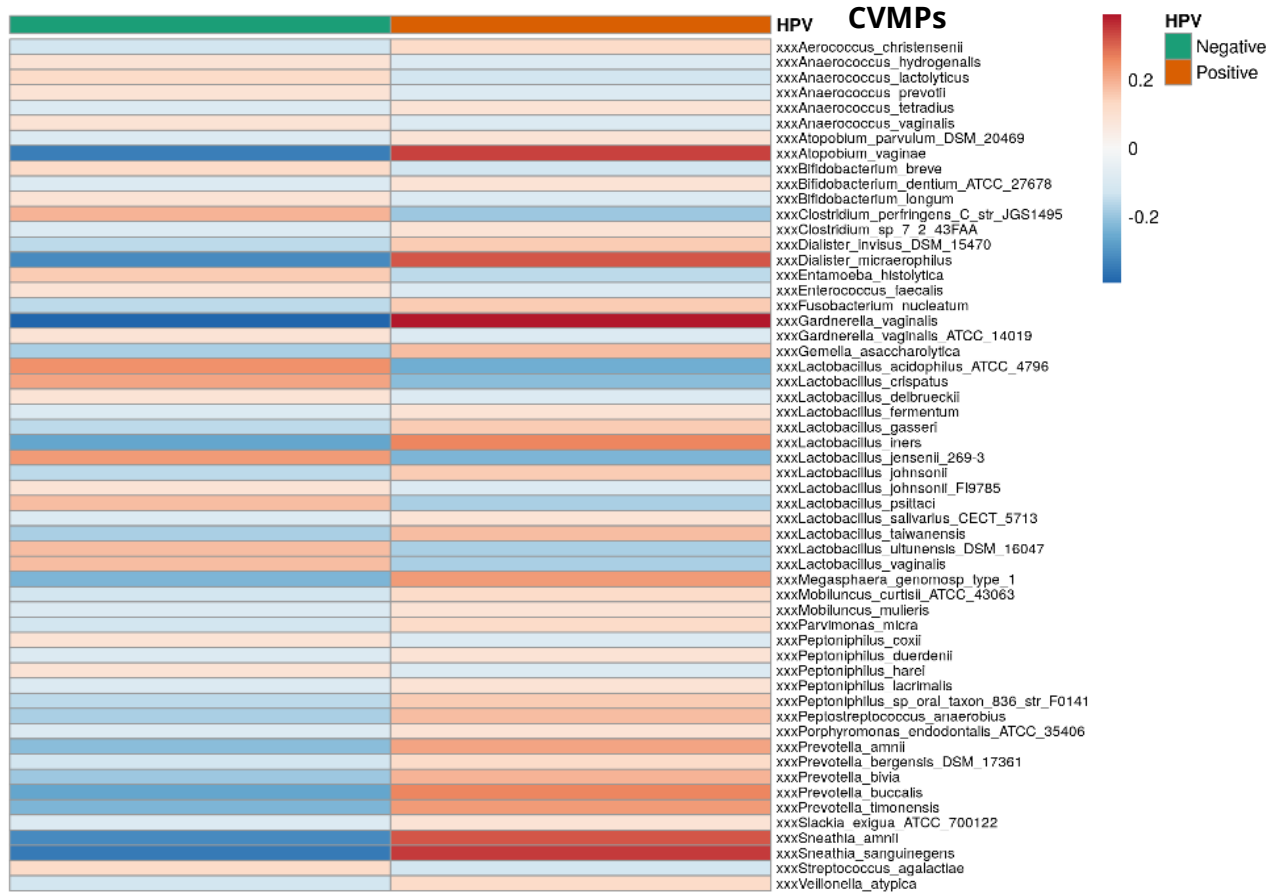

CVMPs: cervicovaginal microbiome panel shortened.
